# Supplementary material
Source: publisher site journal article supplement (https://www.spandidos-publications.com/1759/downloadSupplementary)
Supplement: Supplementary file 1 [file downloadSupplementary]

## Sheet: Sheet1
Table SI. Amount of saline solution soaked in the Schirmer test paper and the scale.
Amount (μl)	Scale (mm)	Tear amount/mm (μl)
2	3	0.66
3	7	0.43
5	11	0.45
8	17	0.47
10	20	0.5
15	30	0.5
20	35	0.5
		Ave. 0.501 μl/mm
